# Supplementary material for: Increasing Cation Ion Symmetry Reduces Ionic Liquid Ordering in Thin Films
Source: PubMed Central journal article supplement (PMC11571225; doi:10.1021/acs.jpcb.4c04413), 2024-11-05
Supplement: jp4c04413_si_001.pdf [file jp4c04413_si_001.pdf]

## Supporting Information for

### Increasing cation ion symmetry reduces ionic liquid ordering in thin films

#### Author information:

Van Den Top, Michael Blake<sup>1</sup> ; [mvandentop@uiowa.edu](mailto:mvandentop@uiowa.edu) 0009-0007-1631-4759; University of Iowa

Horvath, Andrew<sup>1</sup> ; [Andrew-horvath@uiowa.edu](mailto:Andrew-horvath@uiowa.edu) 0000-0001-9067-3206; University of Iowa

Koutsoukos, Spyridon<sup>2</sup> ; [s.koutsoukos18@imperial.ac.uk](mailto:s.koutsoukos18@imperial.ac.uk); 0000-0003-2546-5317; Imperial College London

Philippi, Frederik<sup>2</sup> ; [f.philippi18@imperial.ac.uk](mailto:f.philippi18@imperial.ac.uk) 0000-0002-0127-8923; Imperial College London

Daniel Rauber ; [daniel.rauber@uni-saarland.de](mailto:daniel.rauber@uni-saarland.de) 0000-0003-0488-4344; Saarland University

Welton, Tom\*<sup>2</sup> ; [t.welton@imperial.ac.uk](mailto:t.welton@imperial.ac.uk) 0000-0002-1750-1683; Imperial College London

Shaw, Scott K.\*<sup>1</sup> ; [scott-k-shaw@uiowa.edu](mailto:scott-k-shaw@uiowa.edu) 0000-0003-3767-3236; University of Iowa

#### Institutions:

1. Department of Chemistry, University of Iowa, Iowa City, Iowa 52242, United States
2. Department of Chemistry, Imperial College London SW7 2AZ, UK
3. Department of Chemistry, Saarland University, Campus B 2.2, 66123 Saarbrücken, Germany

#### Contents:

Figure S1: Vibrational frequency of the B-C mode vs time

Page 2

**Figure S1:**

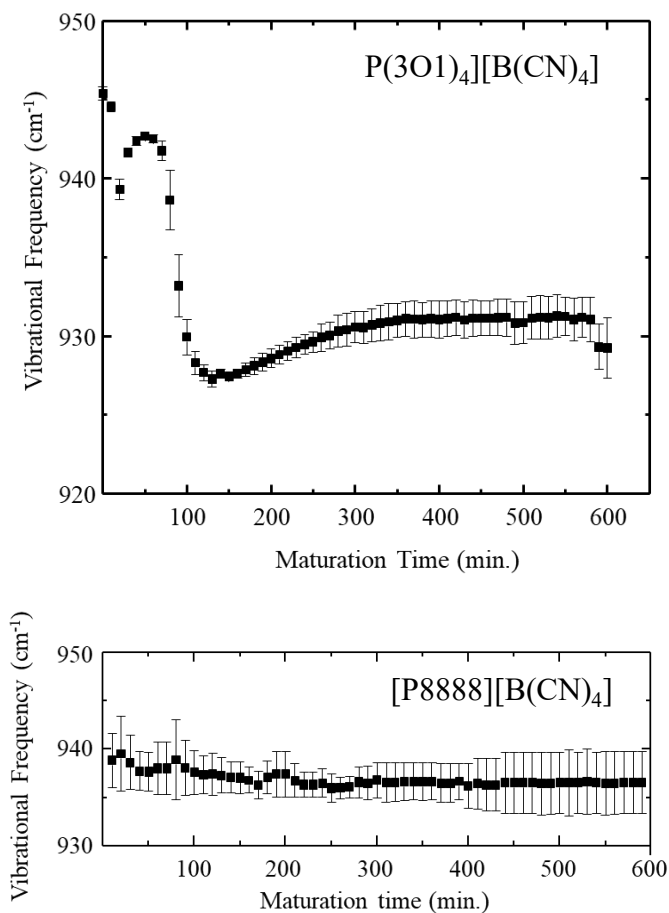

**TOP:** The center frequency of the vibrational mode assigned to the B-C stretch acquired on  $[P(3O1)_4][B(CN)_4]$  as a function of time after substrate rotation is ceased. Data points (black squares) are representative of  $n \geq 3$  trials. Error bars represent standard deviation in the measurement.

**BOTTOM:** The center frequency of the vibrational mode assigned to the B-C stretch acquired on  $[P8888][B(CN)_4]$  as a function of time after substrate rotation is ceased. Data points (black squares) are representative of  $n \geq 3$  trials. Error bars represent standard deviation in the measurement.
